# Supplementary material for: A β-to-β 2,5-thienylene-bridged cyclic porphyrin tetramer: its rational synthesis and 1 : 2 binding mode with C60
Source: Royal Society of Chemistry journal article supplement (doi:10.1039/c0sc00605j), 2011-01-01
Supplement: c0sc00605j.pdf [file c0sc00605j.pdf]

**Supporting Information**  
**for**  
**A  $\beta$ -to- $\beta$ 2,5-Thienylene-bridged Cyclic Porphyrin Tetramer: Its Rational Synthesis and**  
**1:2 Binding Mode with C<sub>60</sub>**

**Jianxin Song,<sup>1</sup> Naoki Aratani,<sup>\*1,2</sup> Hiroshi Shinokubo,<sup>\*3</sup> and Atsuhiko Osuka<sup>\*1</sup>**

*<sup>1</sup>Department of Chemistry, Graduate School of Science, Kyoto University, Sakyo-ku, Kyoto 606-8502, Japan, <sup>2</sup>PRESTO, Japan Science and Technology Agency, <sup>3</sup>Department of Applied Chemistry, Graduate School of Engineering, Nagoya University, Chikusa-ku, Nagoya 464-8603, Japan*

E-mail: aratani@kuchem.kyoto-u.ac.jp; hshino@kuchem.kyoto-u.ac.jp; osuka@kuchem.kyoto-u.ac.jp

**Table of Contents**

|                                                                            |     |
|----------------------------------------------------------------------------|-----|
| Instrumentation and Materials .....                                        | S2  |
| General Procedures .....                                                   | S2  |
| MALDI-TOF Mass Spectra .....                                               | S5  |
| <sup>1</sup> H NMR Spectra .....                                           | S10 |
| UV-vis Spectral Studies .....                                              | S15 |
| X-Ray Crystal Structures of <b>4Zn</b> and <b>4Ni-C<sub>60</sub></b> ..... | S18 |

## Instrumentation and Materials

$^1\text{H}$  NMR (600 MHz) spectra were taken on a JEOL ECA-600 spectrometer, and chemical shifts were reported as the delta scale in ppm relative to  $\text{CHCl}_3$  as internal reference for  $^1\text{H}$  NMR ( $\delta = 7.260$  ppm). UV/Vis absorption spectra were recorded on a Shimadzu UV-2550 spectrometer. Mass spectra were recorded on a Shimadzu AXIMA-CFRplus using positive-MALDI-TOF method with matrix. X-Ray data were taken on a Bruker SMART APEX X-Ray diffractometer equipped with a large area CCD detector. Preparative separations were performed by silica gel gravity column chromatography (Wako gel C-300). Thin-layer chromatography (TLC) was carried out on aluminum sheets coated with silica gel 60 F254 (Merck 5554). Recycling preparative GPC-HPLC was carried out on a JAI LC-908 using preparative JAI-GEL-2.5H, 3H, and 4H columns (chloroform eluant; flow rate  $3.8 \text{ mL min}^{-1}$ ). Unless otherwise noted, materials obtained from commercial suppliers were used without further purification.

## General Procedure

**Synthesis of 2Br:** A toluene-DMF solution (4 mL/2 mL) of **1** (140 mg, 0.124 mmol), 2,5-dibromothiophene (2.0  $\mu\text{L}$ , 0.0177 mmol),  $\text{Pd}_2(\text{dba})_3$  (1.6 mg, 0.00177 mmol),  $\text{PPh}_3$  (1.9 mg, 0.007 mmol),  $\text{Cs}_2\text{CO}_3$  (11.5 mg, 0.035 mmol), and CsF (5.4 mg, 0.035 mmol) was degassed through three freeze-pump-thaw cycles, and the reaction flask was purged with argon. The resulting mixture was stirred at reflux for 24 h. The reaction mixture was diluted with  $\text{CH}_2\text{Cl}_2$ , washed with water, and dried over anhydrous sodium sulfate. Evaporation of the solvent followed by GPC and recrystallization with  $\text{CH}_2\text{Cl}_2/\text{MeOH}$  provided **2B** (containing 10% mono-borylated dimer) in ca. 80% yield as a dark red solid. A toluene-DMF solution (2 mL/1 mL) of **2B** (20.8 mg), 2,5-dibromothiophene (0.050 mL, 0.44 mmol),  $\text{Pd}_2(\text{dba})_3$  (0.34 mg, 0.00038 mmol),  $\text{PPh}_3$  (0.4 mg, 0.0015 mmol),  $\text{Cs}_2\text{CO}_3$  (6.5 mg, 0.020 mmol), and CsF (3.0 mg, 0.020 mmol) was degassed through three freeze-pump-thaw cycles, and the reaction flask was purged with argon. The resulting mixture was stirred at reflux for 24 h. The reaction mixture was diluted with  $\text{CH}_2\text{Cl}_2$ , washed with water, and dried over anhydrous sodium sulfate. Evaporation of the solvent followed by GPC and silica-gel column chromatography ( $\text{CH}_2\text{Cl}_2$ -hexane as an eluent)

and recrystallization with CH<sub>2</sub>Cl<sub>2</sub>/MeOH furnished **2Br** (13 mg, 0.006 mmol) in 48% yield (in 2 steps) as a dark red solid. **2B**: <sup>1</sup>H NMR (CDCl<sub>3</sub>): δ 11.70 (s, 2H, *meso*-H), 9.58 (s, 2H, β-H), 9.26 (s, 2H, β-H), 8.99 (d, *J* = 4.6 Hz, 2H, β-H), 8.94 (d, *J* = 4.6 Hz, 2H, β-H), 8.84 (m, 4H, β-H), 8.61 (s, 2H, thiophene-H), 8.20 (d, *J* = 1.8 Hz, 4H, Ar-*o*-H), 8.09 (d, *J* = 1.8 Hz, 4H, Ar-*o*-H), 8.08 (d, *J* = 1.8 Hz, 4H, Ar-*o*-H), 7.80 (m, 6H, Ar-*p*-H), 1.58 (s, 36H, *tert*-butyl), 1.56 (s, 36H, *tert*-butyl), 1.55 (s, 36H, *tert*-butyl), 1.43 (s, 24H, *Bpin*), and -2.47 (s, 4H, NH) ppm; MS (MALDI-TOF-MS): *m/z* = 2082.40, calcd for C<sub>140</sub>H<sub>170</sub>B<sub>2</sub>N<sub>8</sub>O<sub>4</sub>S = 2082.33 [M]<sup>+</sup>. **2Br**: <sup>1</sup>H NMR (CDCl<sub>3</sub>): δ 11.20 (s, 2H, *meso*-H), 9.38 (s, 2H, β-H), 9.08 (s, 2H, β-H), 9.03 (d, *J* = 4.6 Hz, 2H, β-H), 9.01 (d, *J* = 5.0 Hz, 2H, β-H), 8.98 (m, 4H, β-H), 8.47 (s, 2H, thiophene-H), 8.29 (d, *J* = 1.8 Hz, 4H, Ar-*o*-H), 8.21 (d, *J* = 1.8 Hz, 4H, Ar-*o*-H), 8.16 (d, *J* = 1.8 Hz, 4H, Ar-*o*-H), 7.92 (t, *J* = 1.8 Hz, 2H, Ar-*p*-H), 7.89 (t, *J* = 1.8 Hz, 2H, Ar-*p*-H), 7.88 (d, *J* = 3.6 Hz, 2H, thiophene-H), 7.87 (t, *J* = 1.8 Hz, 2H, Ar-*p*-H), 7.08 (d, *J* = 3.6 Hz, 2H, thiophene-H), 1.65 (s, 36H, *tert*-butyl), 1.63 (s, 36H, *tert*-butyl), 1.60 (s, 36H, *tert*-butyl), and -2.38 (s, 4H, NH) ppm; MS (MALDI-TOF-MS): *m/z* = 2152.90, calcd for C<sub>136</sub>H<sub>150</sub>Br<sub>2</sub>N<sub>8</sub>S<sub>3</sub> = 2152.95 [M]<sup>+</sup>.

**Synthesis of 4H**: A toluene-DMF solution (2 mL/1 mL) of **2Br** (13 mg, 0.006 mmol), **2B** (12.5 mg, 0.006 mmol), Pd<sub>2</sub>(dba)<sub>3</sub> (0.92 mg, 0.001 mmol), PPh<sub>3</sub> (1.1 mg, 0.004 mmol), Cs<sub>2</sub>CO<sub>3</sub> (3.9 mg, 0.012 mmol), and CsF (1.8 mg, 0.012 mmol) was degassed through three freeze-pump-thaw cycles, and the reaction flask was purged with argon. The resulting mixture was stirred at reflux for 48 h. The reaction mixture was diluted with CH<sub>2</sub>Cl<sub>2</sub>, washed with water, and dried over anhydrous sodium sulfate. Evaporation of the solvent followed by GPC and silica-gel column chromatography (CH<sub>2</sub>Cl<sub>2</sub>-hexane as an eluent) and recrystallization with CH<sub>2</sub>Cl<sub>2</sub>/MeOH afforded **4H** (12 mg, 0.0031 mmol) in 52% yield as a dark red solid. **4H**: <sup>1</sup>H NMR (CDCl<sub>3</sub>, rt): δ 11.27 (s, 4H, *meso*-H), 9.07 (s, 8H, β-H), 8.81 (d, *J* = 5.0 Hz, 8H, β-H), 8.77 (d, *J* = 5.0 Hz, 8H, β-H), 8.67 (s, 8H, thiophene-H), 8.06 (t, *J* = 1.8 Hz, 8H, Ar-*o*-H), 8.04 (t, *J* = 1.8 Hz, 4H, Ar-*o*-H), 7.97 (t, *J* = 1.8 Hz, 8H, Ar-*o*-H), 7.89 (t, *J* = 1.8 Hz, 4H, Ar-*o*-H), 7.73 (t, *J* = 1.8 Hz, 4H, Ar-*p*-H), 7.71 (t, *J* = 1.8 Hz, 8H, Ar-*p*-H), 1.52 (s, 72H, *tert*-butyl), 1.49 (s, 36H, *tert*-butyl), 1.41 (s, 36H, *tert*-butyl), 1.38 (s, 72H, *tert*-butyl), and -2.60 (s, 8H, NH) ppm; UV/Vis (CH<sub>2</sub>Cl<sub>2</sub>): λ<sub>max</sub> (ε [M<sup>-1</sup> cm<sup>-1</sup>]) =

428 (270000), 531 (78000), 603 (32000), and 657 (6000) nm; MS (MALDI-TOF-MS):  $m/z = 3821.30$ , calcd for  $C_{264}H_{296}N_{16}S_4 = 3821.26 [M]^+$ ; Fluorescence ( $CH_2Cl_2$ ,  $\lambda_{ex} = 428$  nm):  $\lambda_{max} = 666$  nm.  $\Phi_F = 0.032$ .

**Synthesis of 4Ni:** **4H** (5.0 mg) was added to a round-bottomed 50-mL flask with a magnetic bar, and dissolved in toluene. Excess nickel(II) acetylacetonate was added. After stirring for 5 h, the reaction mixture was passed through an alumina column, evaporated and recrystallized from methanol and dichloromethane. **4Ni** was obtained quantitatively. **4Ni:**  $^1H$  NMR ( $CDCl_3$ , rt):  $\delta$  10.81 (s, 4H, *meso*-H), 8.93 (s, 8H,  $\beta$ -H), 8.70 (d,  $J = 5.0$  Hz, 8H,  $\beta$ -H), 8.69 (d,  $J = 5.0$  Hz, 8H,  $\beta$ -H), 8.11 (s, 8H, thiophene-H), 7.66 (t,  $J = 1.8$  Hz, 4H, *Ar-p*-H), 7.60 (t,  $J = 1.8$  Hz, 8H, *Ar-p*-H), 1.42 (s, 72H, *tert*-butyl), and 1.29 (s, 144H, *tert*-butyl) ppm; UV/Vis ( $CH_2Cl_2$ ):  $\lambda_{max}$  ( $\epsilon [M^{-1} cm^{-1}]$ ) = 437 (300000), 545 (67000), and 578 (50000) nm; HR-MS (MALDI-TOF-MS):  $m/z = 4047.84$ , calcd for  $C_{264}H_{288}N_{16}Ni_4S_4 = 4047.94 [M]^+$ .

**Synthesis of 4Zn:** **4H** (5.0 mg) was added to a round-bottomed 50-mL flask and dissolved in chloroform. An excess amount of saturated zinc(II) acetate in methanol was added. The complete metalation was confirmed by TLC and MALDI-TOF mass spectra. The reaction mixture was passed through a short alumina column and recrystallized with  $CH_2Cl_2/MeOH$ . **4Zn** was obtained as a red solid quantitatively. **4Zn:**  $^1H$  NMR ( $CDCl_3$ , rt):  $\delta$  11.37 (s, 4H, *meso*-H), 9.16 (s, 8H,  $\beta$ -H), 8.93 (d,  $J = 5.0$  Hz, 8H,  $\beta$ -H), 8.89 (d,  $J = 5.0$  Hz, 8H,  $\beta$ -H), 8.67 (s, 8H, thiophene-H), 8.07 (t,  $J = 1.8$  Hz, 8H, *Ar-o*-H), 8.05 (t,  $J = 1.8$  Hz, 4H, *Ar-o*-H), 7.98 (t,  $J = 1.8$  Hz, 8H, *Ar-o*-H), 7.91 (t,  $J = 1.8$  Hz, 4H, *Ar-o*-H), 7.73 (t,  $J = 1.8$  Hz, 4H, *Ar-p*-H), 7.71 (t,  $J = 1.8$  Hz, 8H, *Ar-p*-H), 1.52 (s, 72H, *tert*-butyl), 1.49 (s, 36H, *tert*-butyl), 1.43 (s, 36H, *tert*-butyl), and 1.37 (s, 72H, *tert*-butyl) ppm; UV/Vis ( $CH_2Cl_2$ ):  $\lambda_{max}$  ( $\epsilon [M^{-1} cm^{-1}]$ ) = 429 (290000), 452 (270000), 563 (80000), and 597(2600) nm; MS (MALDI-TOF-MS):  $m/z = 4074.80$ , calcd for  $C_{264}H_{288}N_{16}Zn_4S_4 = 4074.90 [M]^+$ ; Fluorescence ( $CH_2Cl_2$ ,  $\lambda_{ex} = 428$  nm):  $\lambda_{max} = 663$  nm.  $\Phi_F = 0.037$ .

Single crystals of **4Zn** suitable for X-ray crystallographic analysis were obtained by vapor diffusion of ethanol into toluene and pyridine solution of **4Zn**.

Single crystals of **4Ni**-C<sub>60</sub> suitable for X-ray crystallographic analysis were obtained by vapor diffusion of 2-propanol into dichlorobenzene solution of **4Ni** and C<sub>60</sub> (the amount of C<sub>60</sub> is excess relative to **4Ni**).

## MALDI-TOF mass spectra

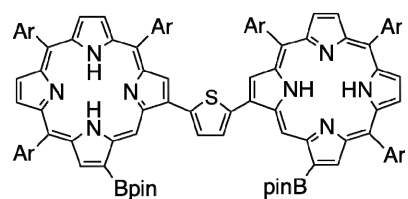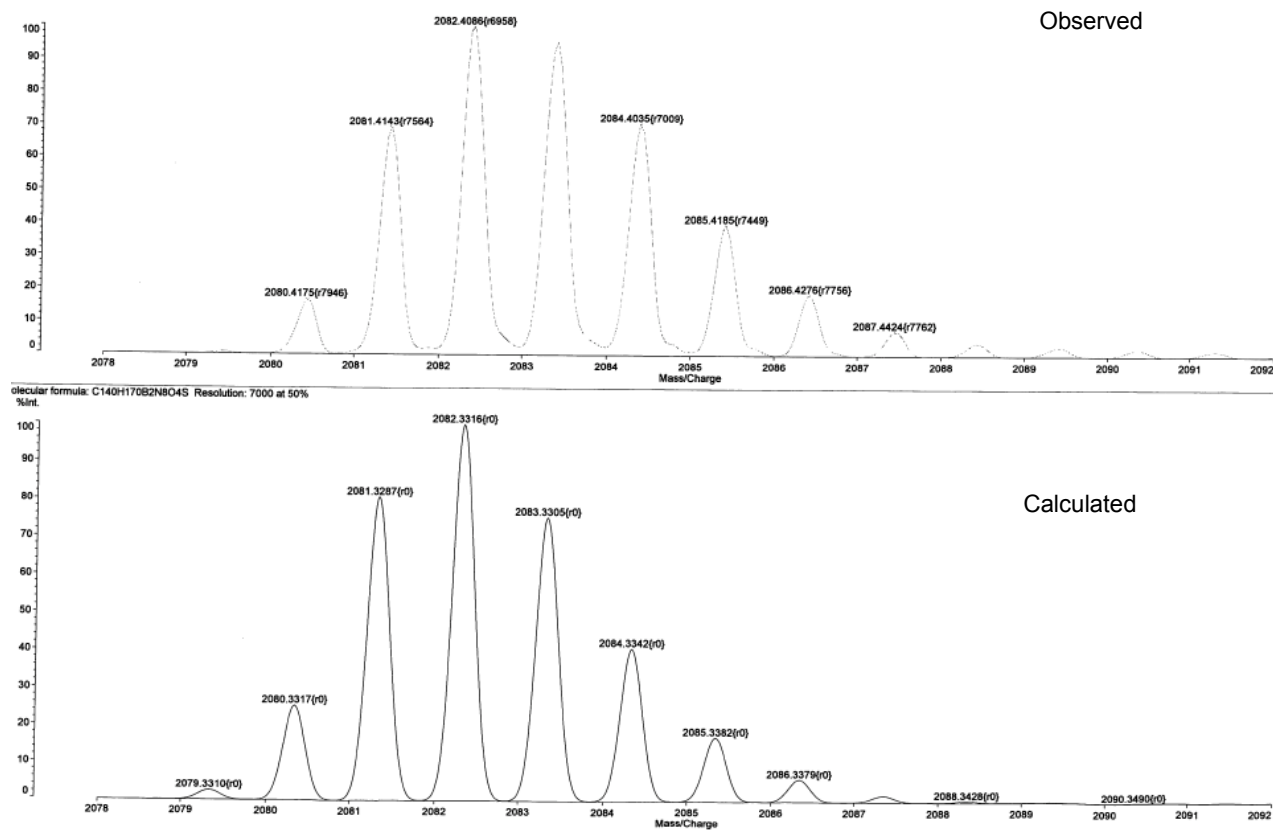

Figure S1. MALDI-TOF mass spectrum of 2B.

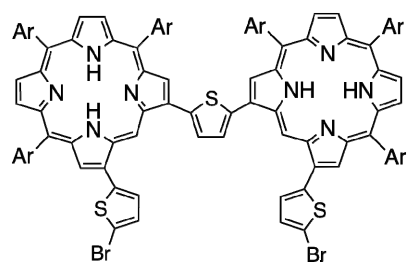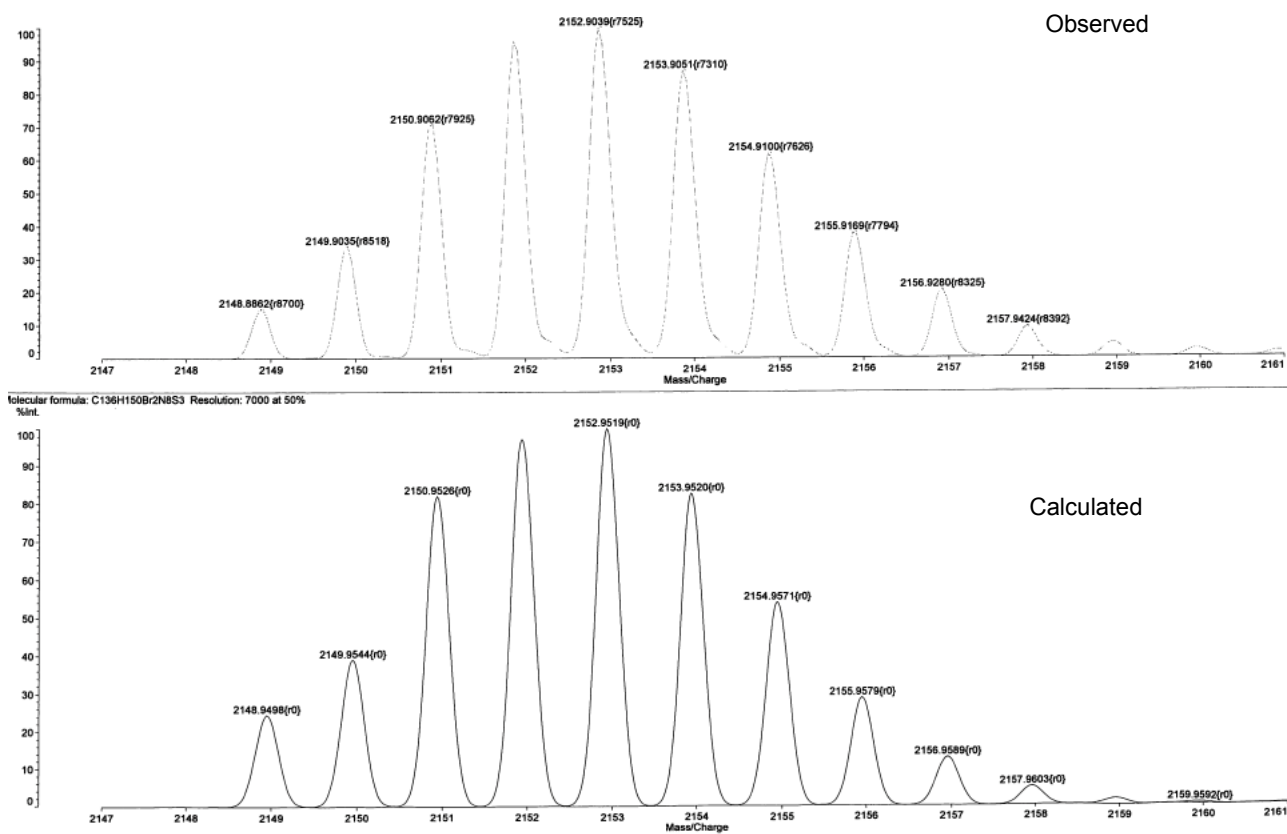

Figure S2. MALDI-TOF mass spectrum of **2Br**.

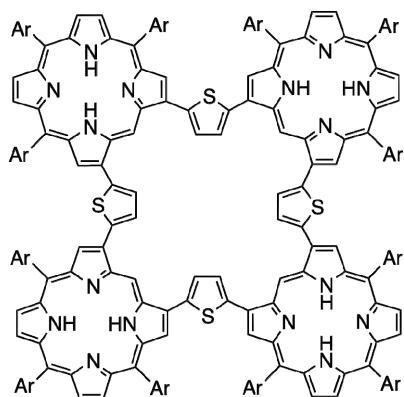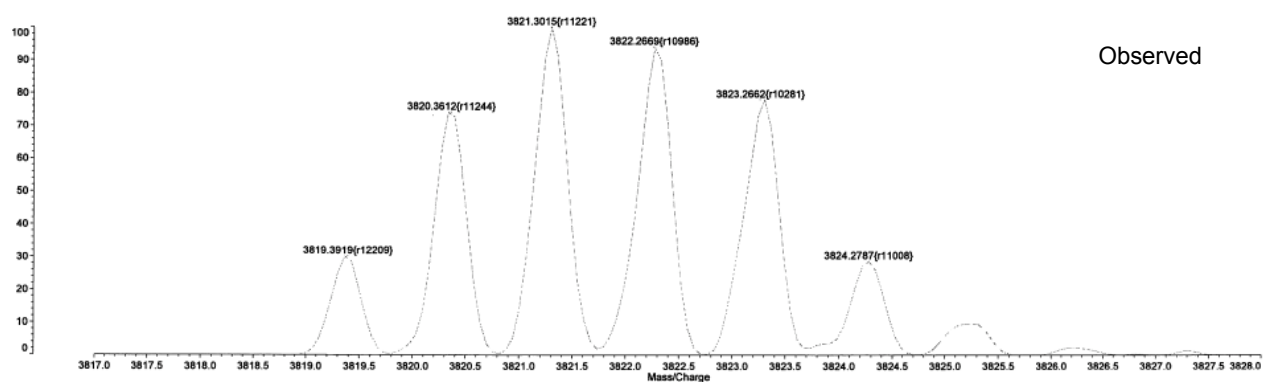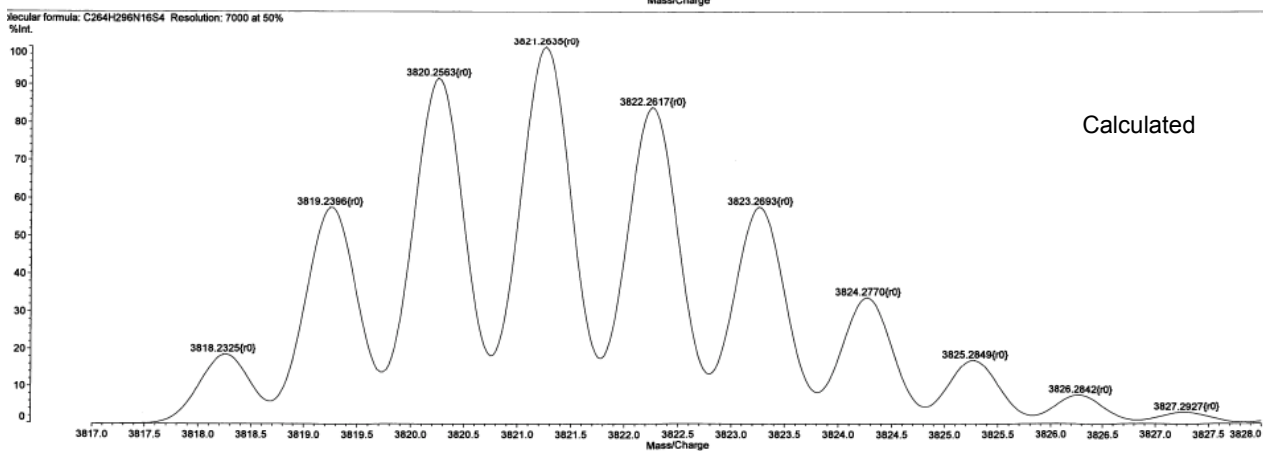

Figure S3. MALDI-TOF mass spectrum of **4H**.



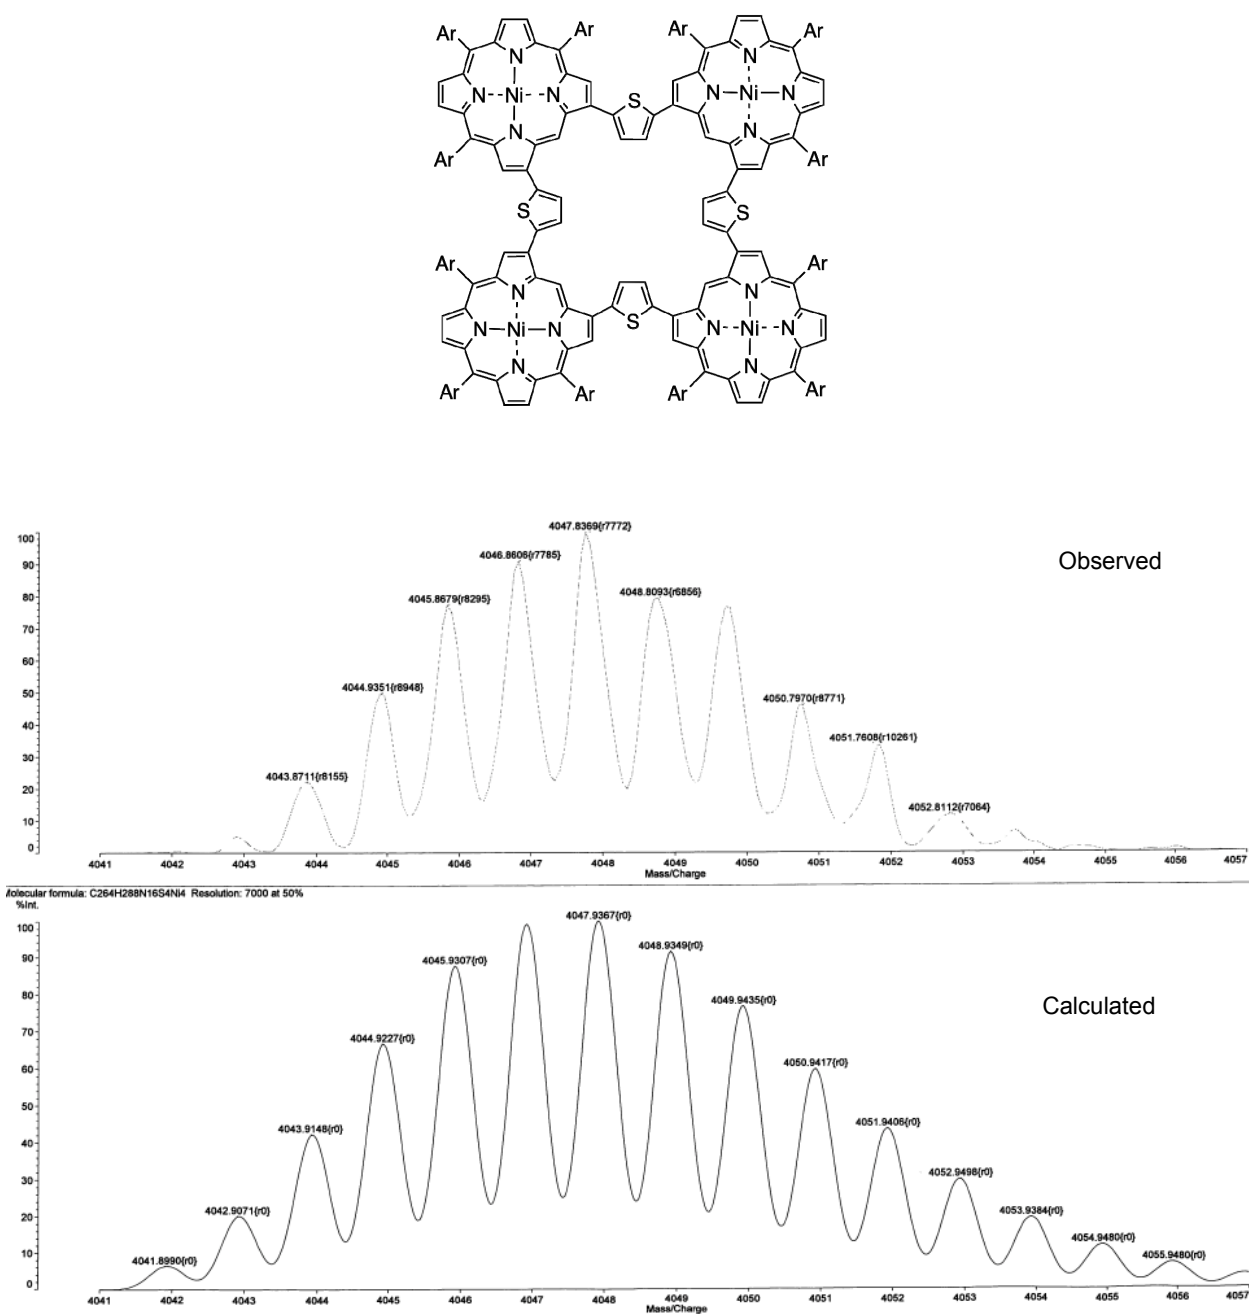

**Figure S4.** MALDI-TOF mass spectrum of **4Ni**.

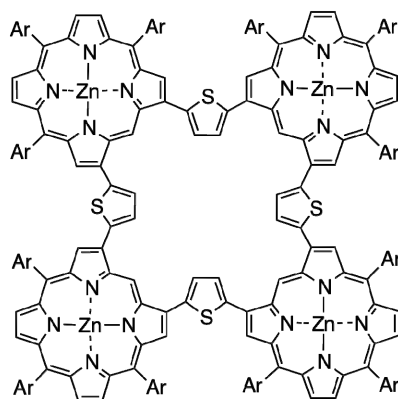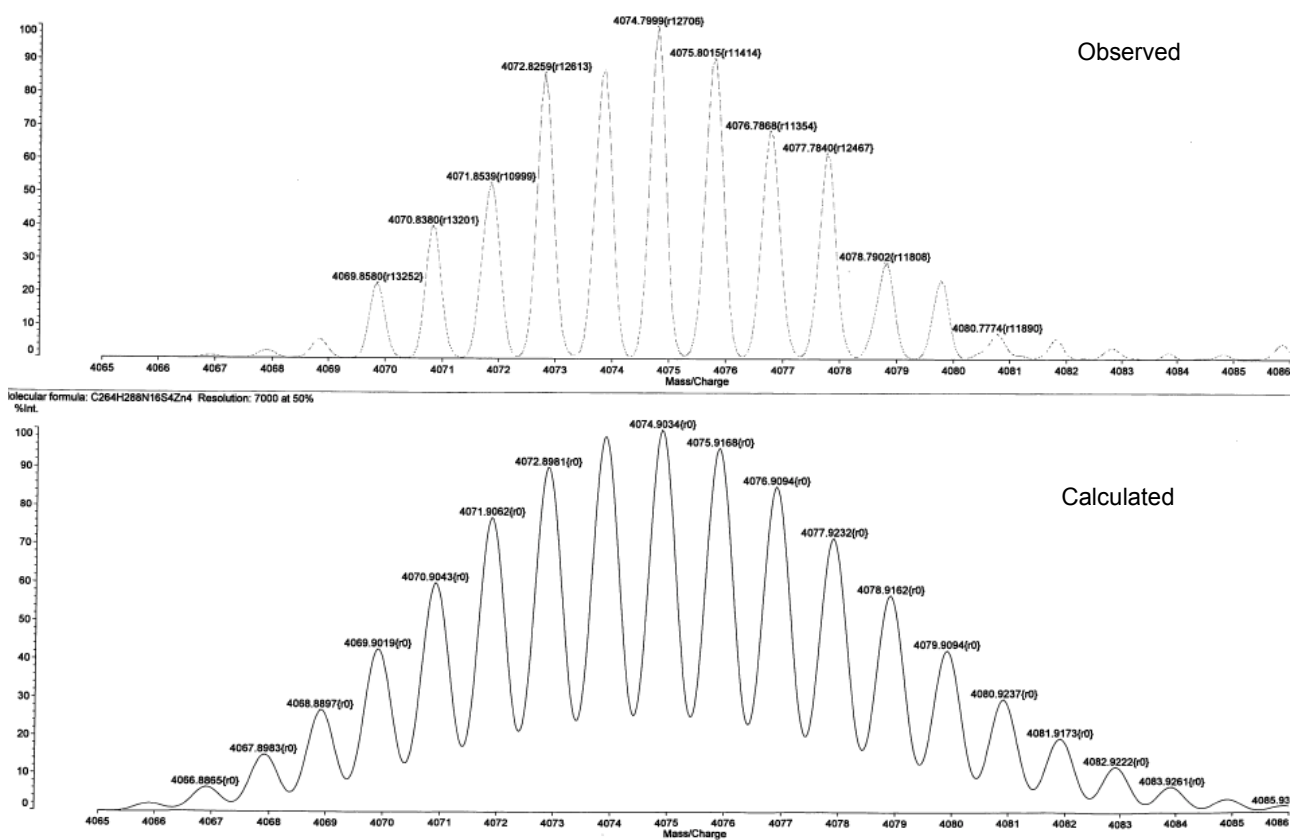

Figure S5. MALDI-TOF mass spectrum of **4Zn**.

$^1\text{H}$  NMR spectra

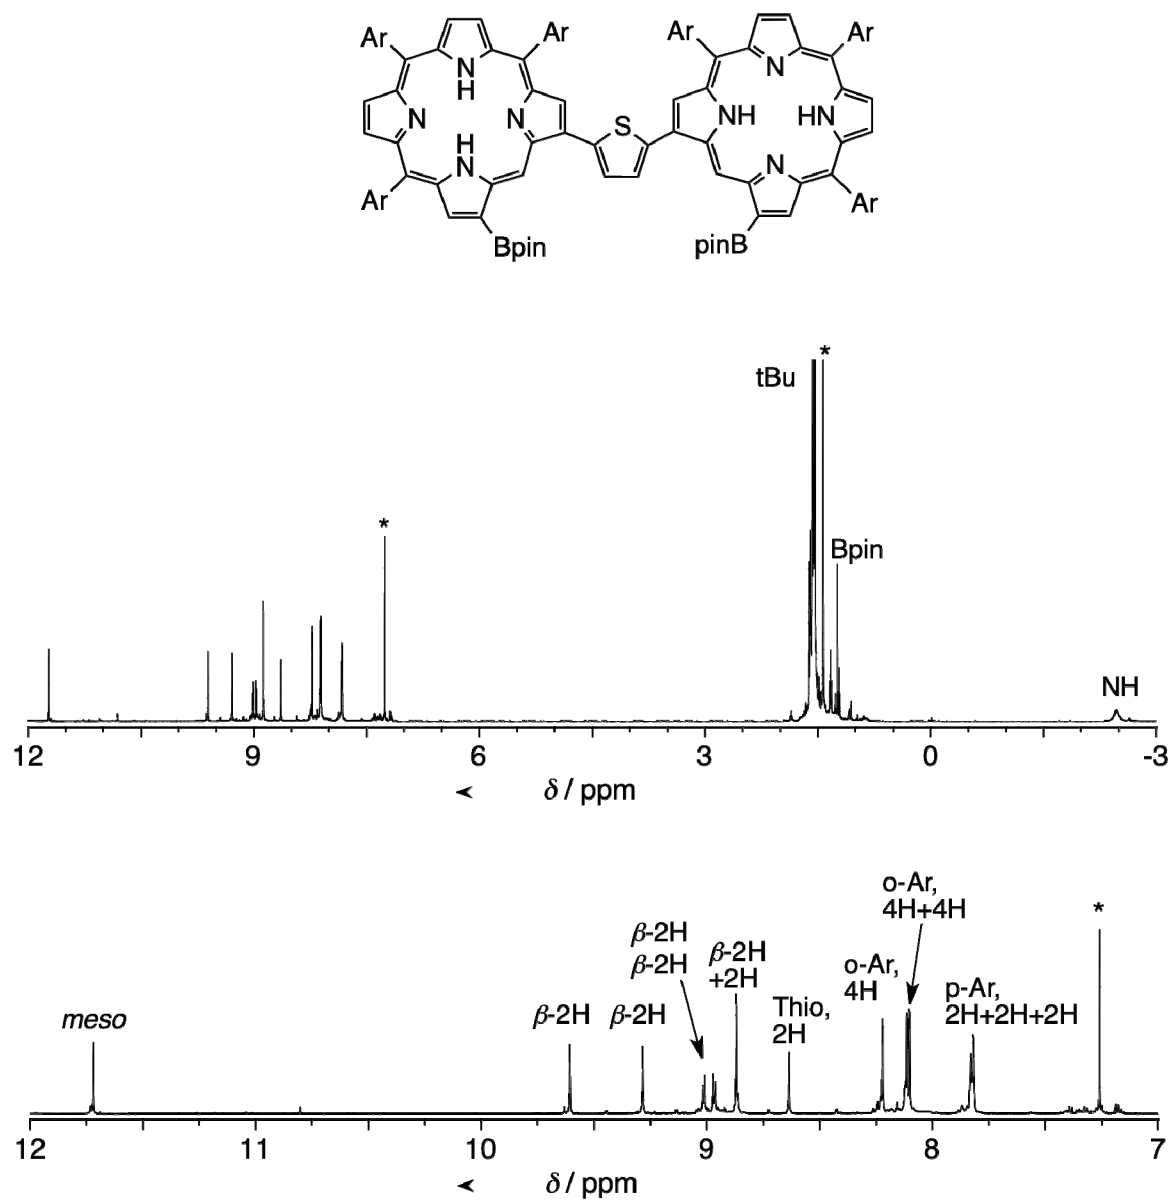

Figure S6.  $^1\text{H}$  NMR spectrum of **2B** in  $\text{CDCl}_3$ .

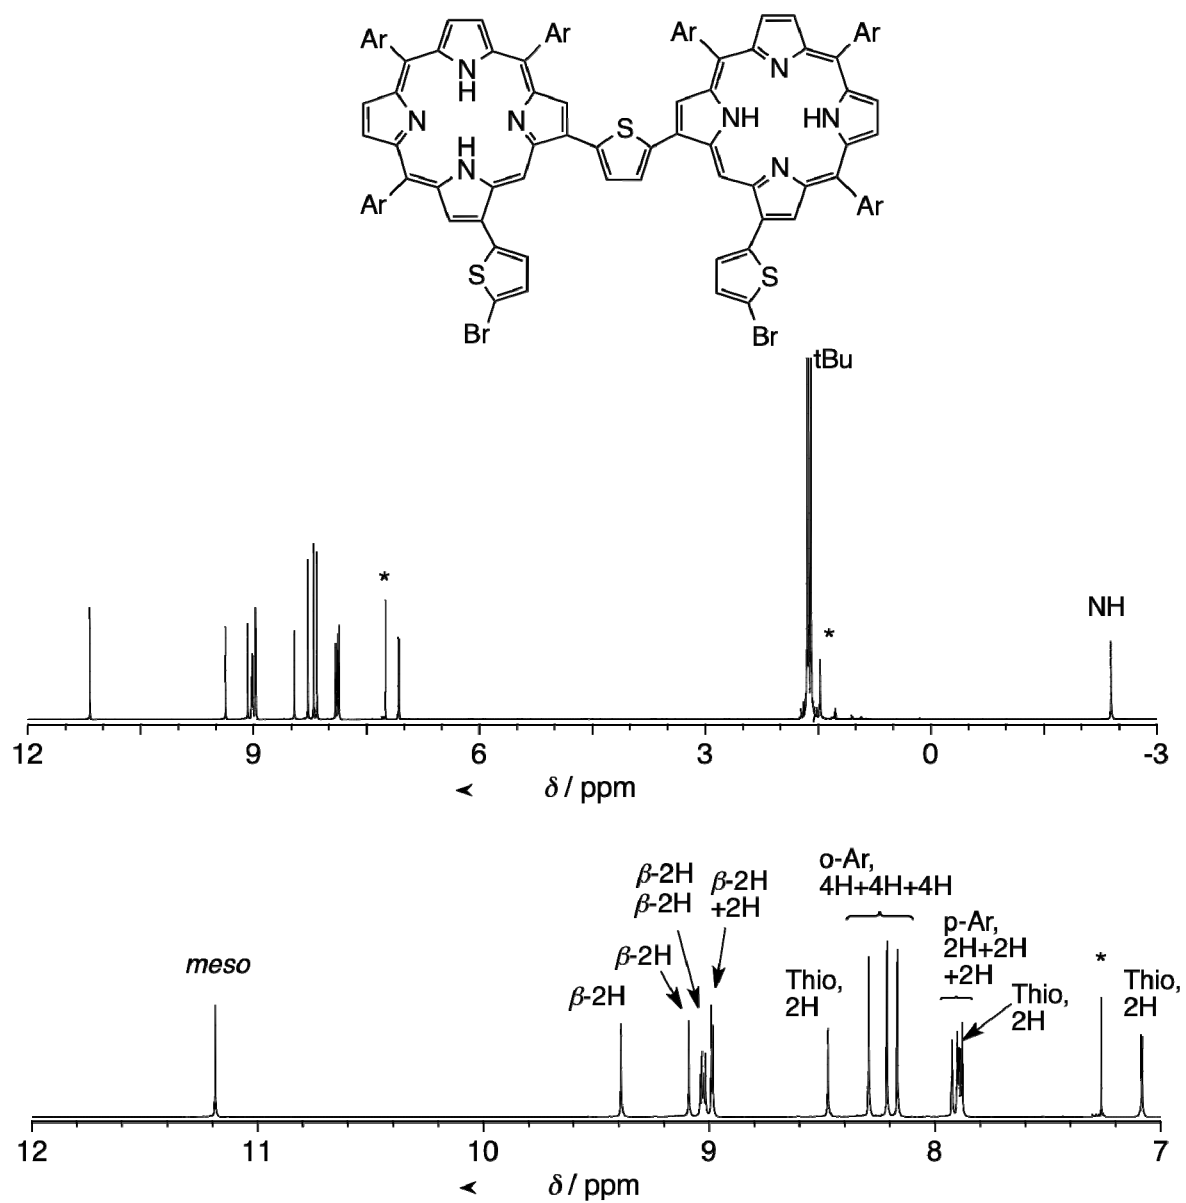

Figure S7.  $^1\text{H}$  NMR spectrum of **2Br** in  $\text{CDCl}_3$ .

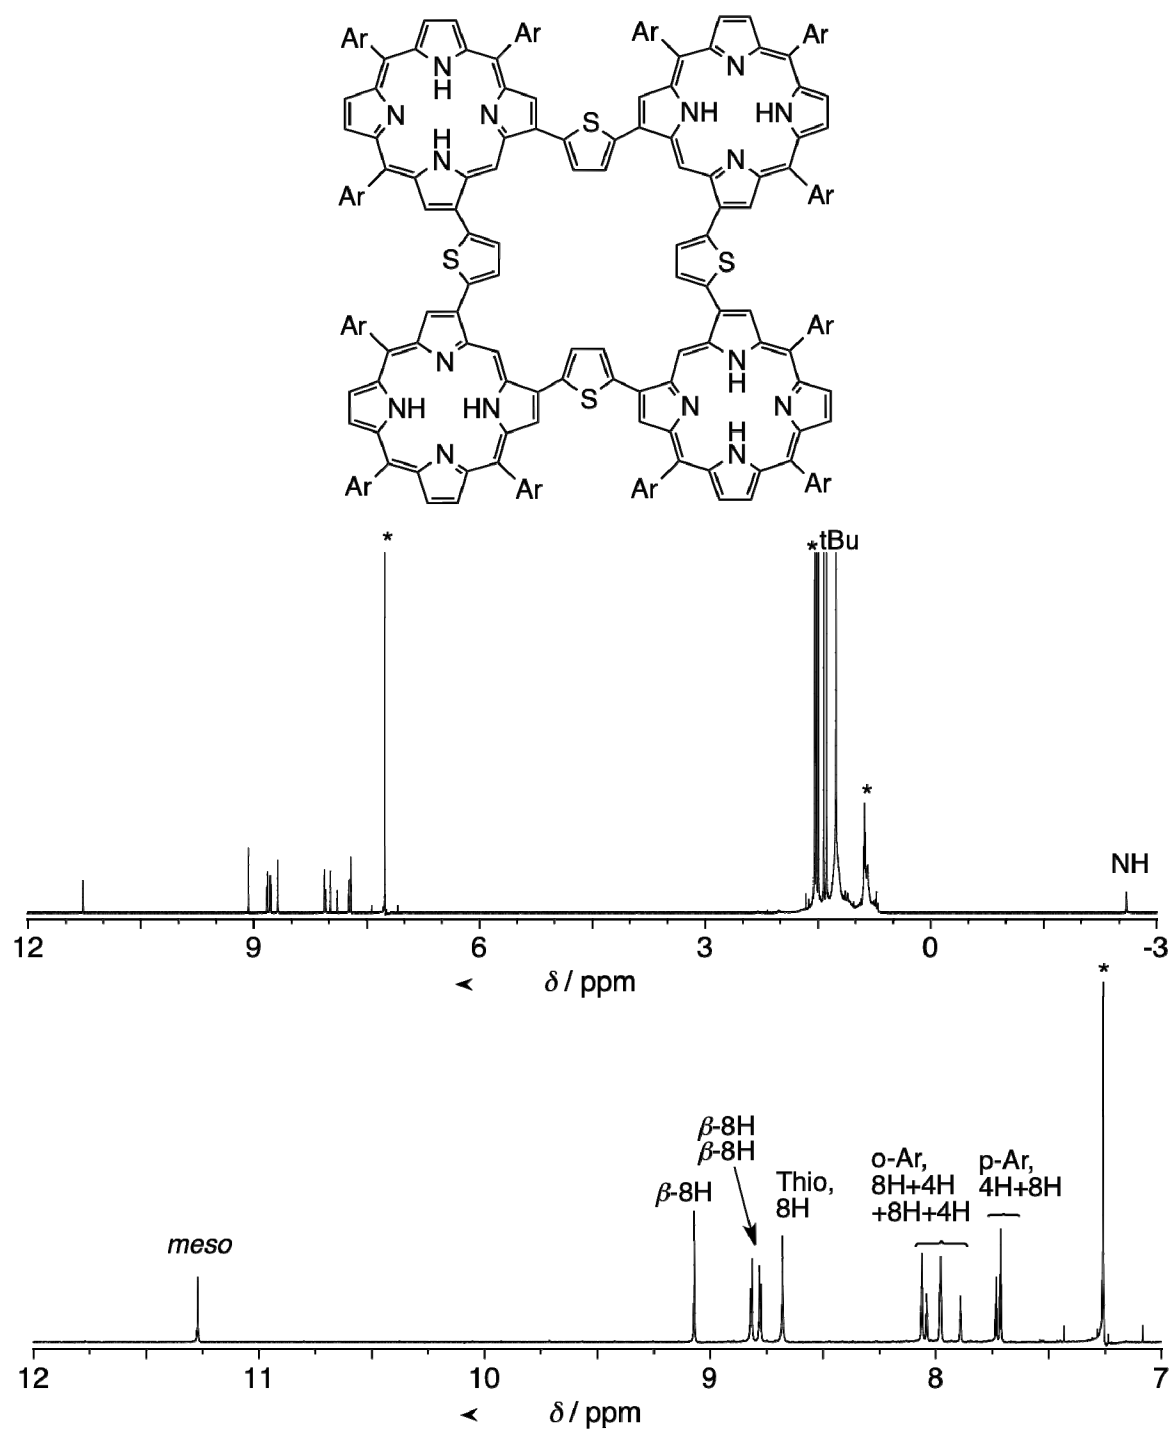

Figure S8. <sup>1</sup>H NMR spectrum of **4H** in CDCl<sub>3</sub>.

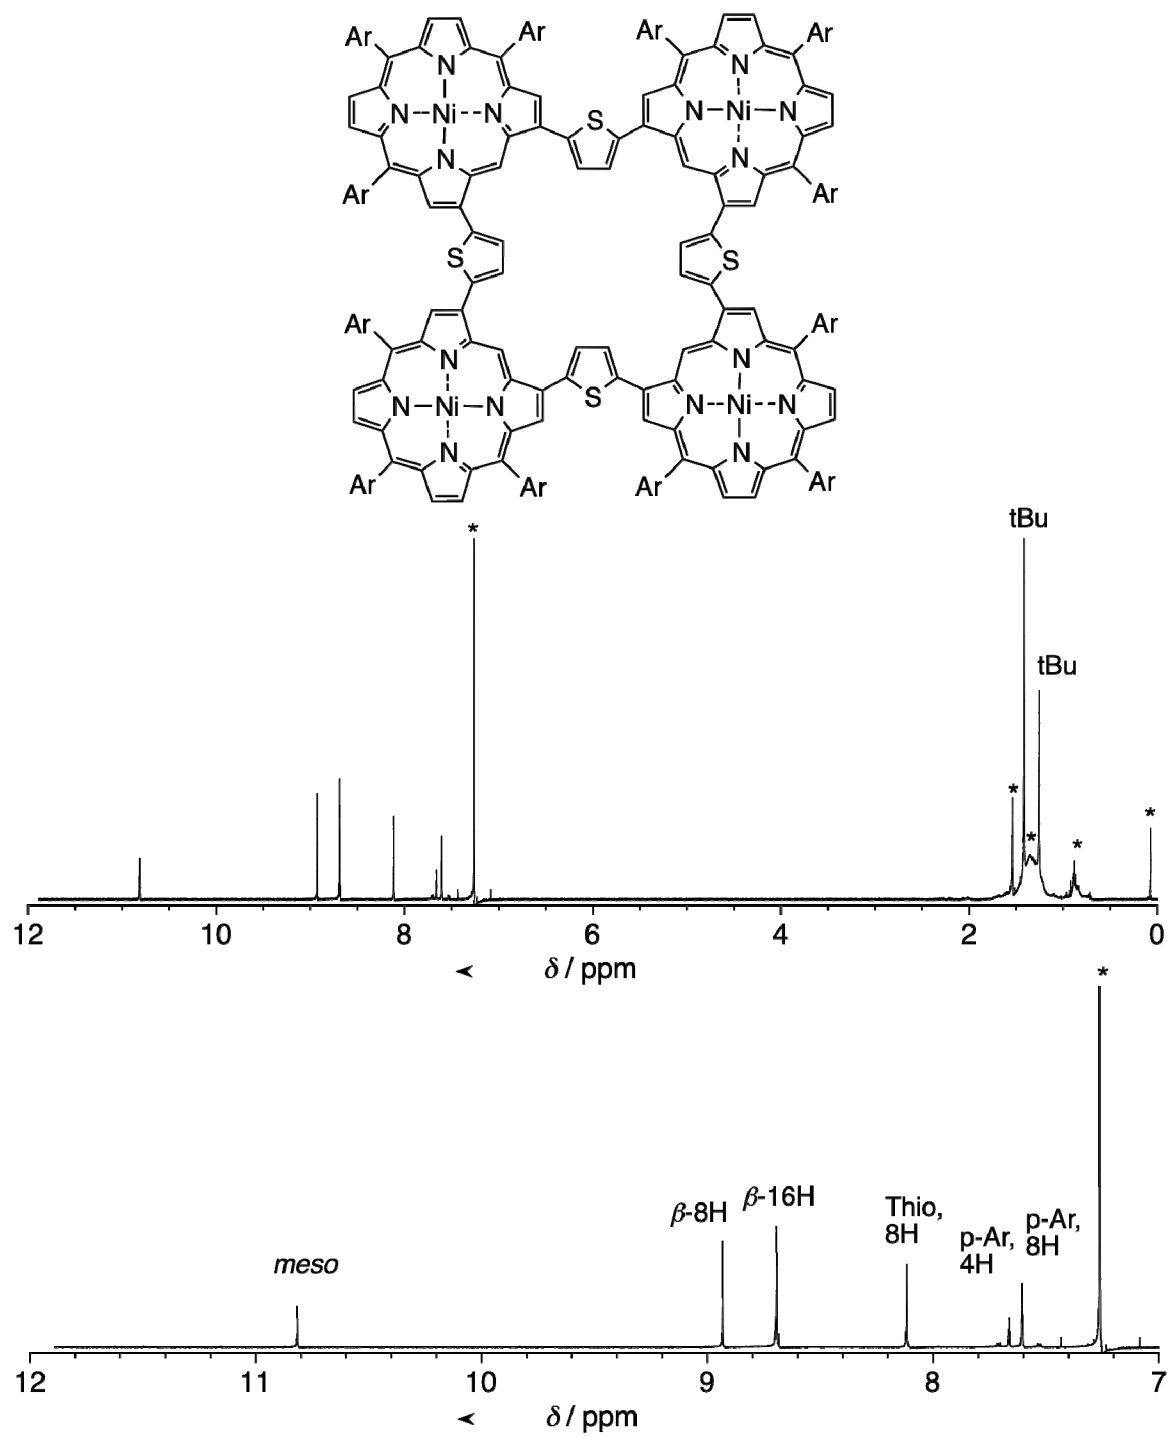

Figure S9. <sup>1</sup>H NMR spectrum of 4Ni in CDCl<sub>3</sub>.

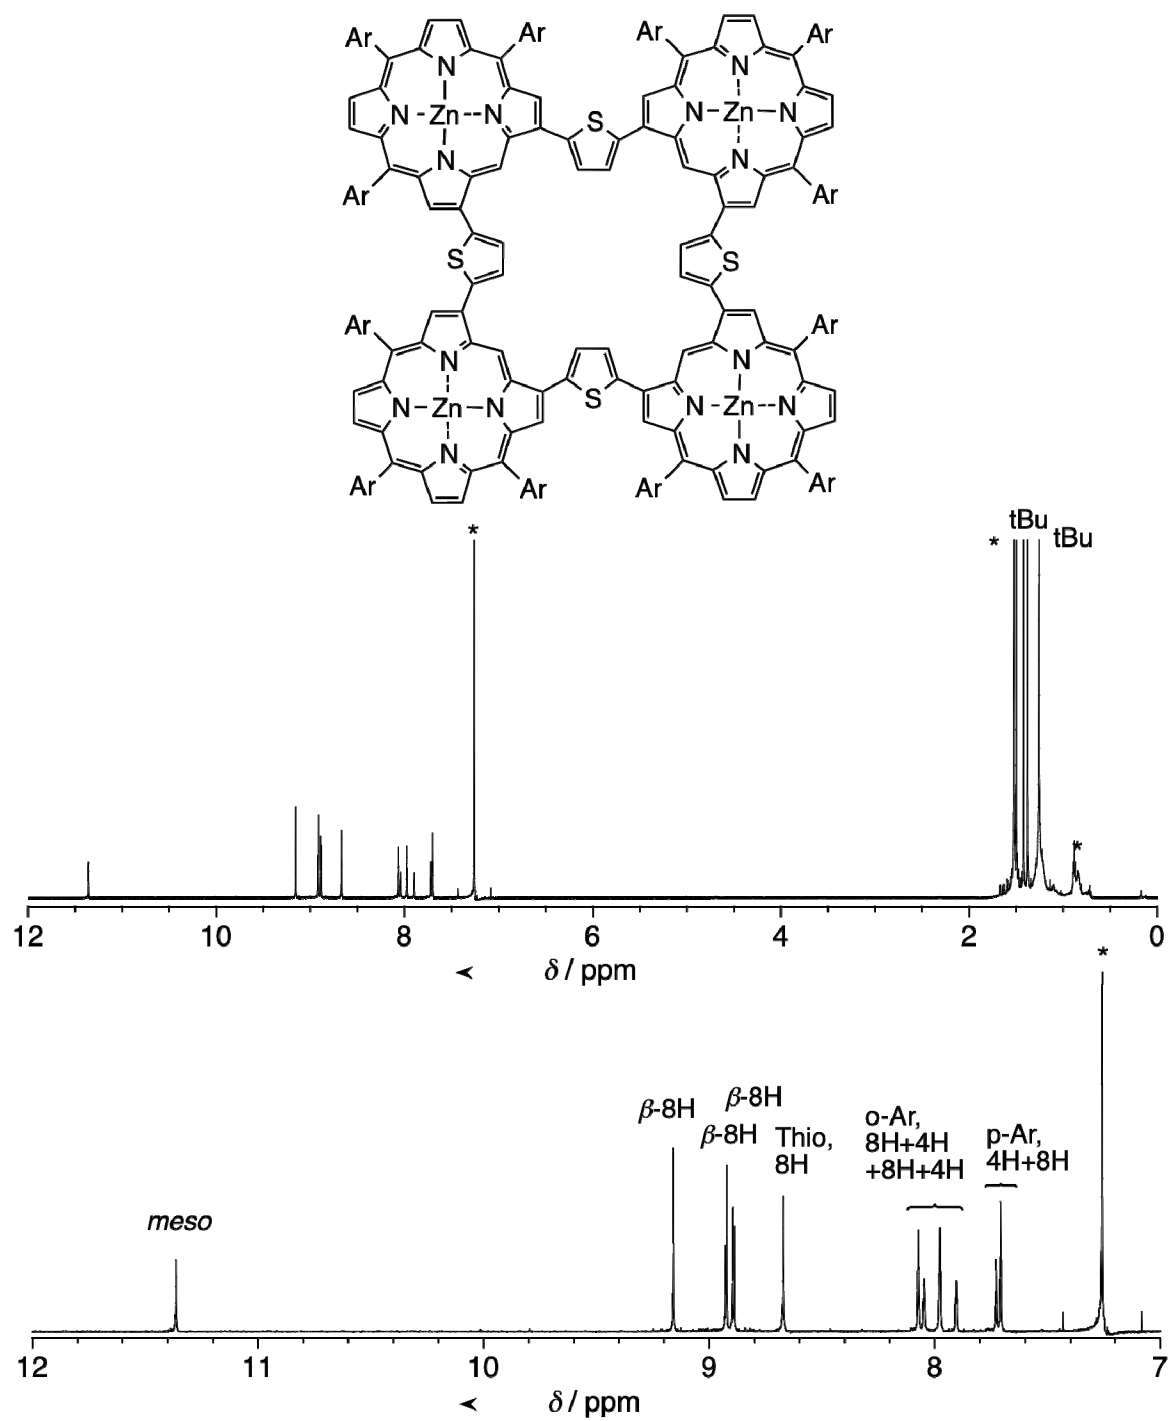

Figure S10.  $^1\text{H}$  NMR spectrum of **4Zn** in  $\text{CDCl}_3$ .

## UV-vis Absorption Spectra

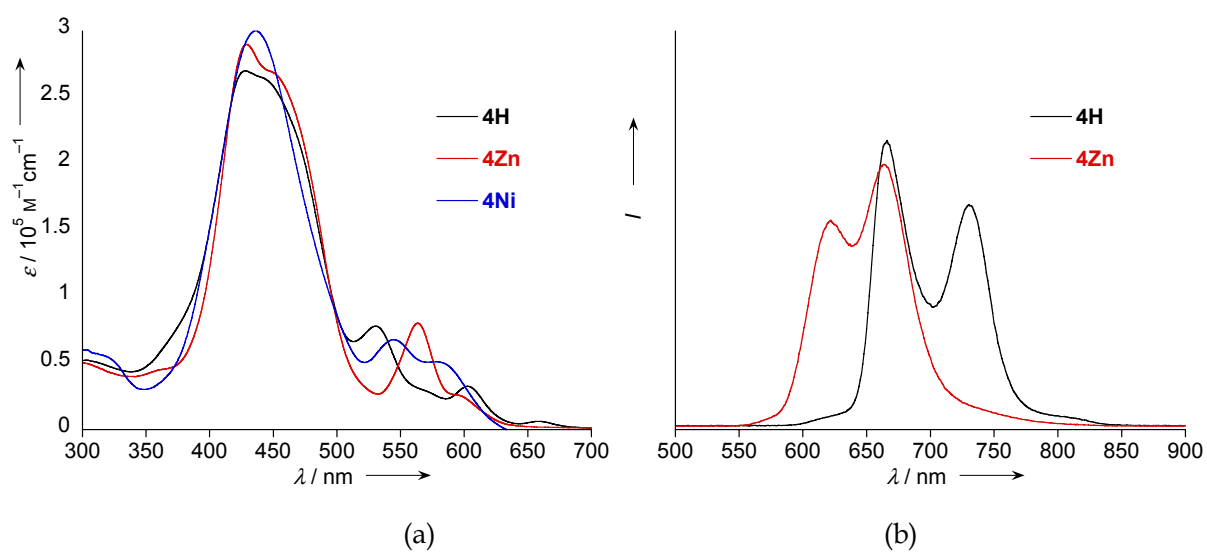

**Figure S11.** UV-vis absorption spectra of (a) **4H** (black line), **4Zn** (red line), **4Ni** (blue line), and Fluorescence spectra of (b) **4H** (black line), **4Zn** (red line) in dichloromethane.



## UV-vis., and $^1\text{H}$ NMR studies of $4\text{Ni}$ with $\text{C}_{60}$ and job's plot

### Typical procedure of UV-vis. titration

An aliquot of a solution of  $\text{C}_{60}$  ( $3.2 \times 10^{-3}$  M in toluene) was added to a solution of  $4\text{Ni}$  ( $2.0 \times 10^{-6}$  M in toluene), and the resulting solutions were subjected to UV-vis. spectroscopy at  $25^\circ\text{C}$  (Figure S12). The spectrum was corrected with a dilution factor and background subtraction. The difference in absorbance of  $4\text{Ni}$  induced by the addition of  $\text{C}_{60}$  was measured at 438 nm. Binding curves were obtained by plotting  $y$  against  $\text{C}_{60}$ , where  $y$  denotes a fraction of complex  $4\text{Ni}-\text{C}_{60}$  and defined as  $y = (\text{Abs}_{\text{obs}} - \text{Abs}_0) / (\text{Abs}_\infty - \text{Abs}_0)$  where  $\text{Abs}_0$ ,  $\text{Abs}_\infty$  is  $\text{Abs}_{\text{obs}}$  at  $\text{C}_{60} = 0$  and infinite, respectively (Figure S12, inset). The analysis of the spectral data provided a value of  $\log K = 7.7 \pm 0.6$ ,  $N = 1.6$ .

### Typical procedure of job's plot

Solution of  $4\text{Ni}$  and  $\text{C}_{60}$  (each 0.02 mM in toluene) were mixed to prepare 12 samples (each 0.3 mL) with varying mole fractions of  $4\text{Ni}$  from 0 to 1, which were subjected to UV-vis spectroscopies at  $25^\circ\text{C}$ . Absorbance values at 438 nm were normalized to the maximal increase  $\Delta\text{Abs}$  in absorbance with the following equation,  $\Delta\text{Abs} = \text{Abs}_{\text{obs}} - \text{Abs}_{\text{ref}}$ , where  $\text{Abs}_{\text{ref}}$  is absorbance of  $4\text{Ni}$  in the absence of  $\text{C}_{60}$  under the same concentration of  $4\text{Ni}$  in the conditions of  $\text{Abs}_{\text{obs}}$ . Job's plot was obtained by plotting  $\Delta\text{Abs}$  values against mole fractions of  $4\text{Ni}$  (Figure S13).

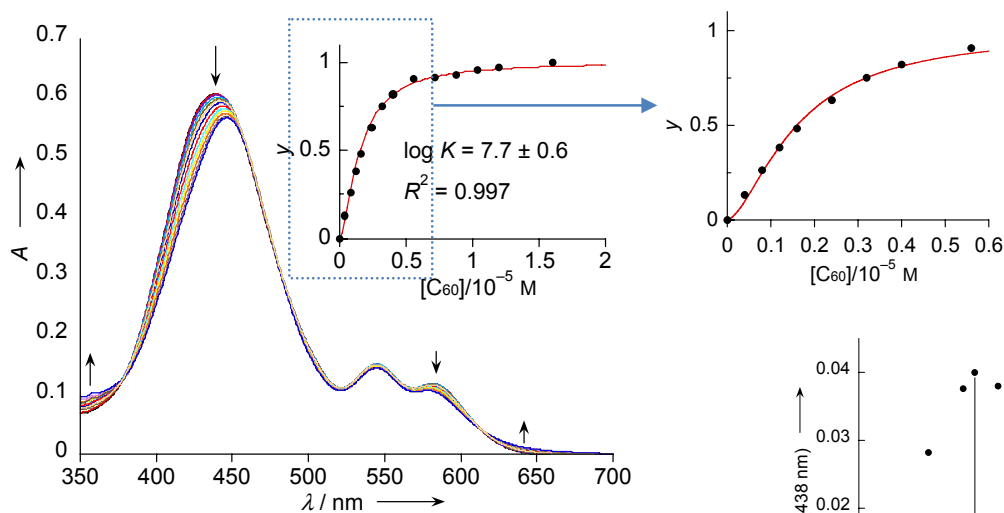

**Figure S12.** Concentration dependence of the UV-vis absorption spectra:  $[4\text{Ni}] = 2.0 \mu\text{M}$ ,  $[\text{C}_{60}] = 0\text{--}16 \mu\text{M}$ , toluene,  $25^\circ\text{C}$ . formation. Inset: a titration curve of  $4\text{Ni}$  under various concentration of  $[\text{C}_{60}]$ . Low concentration area is enlarged at right side.

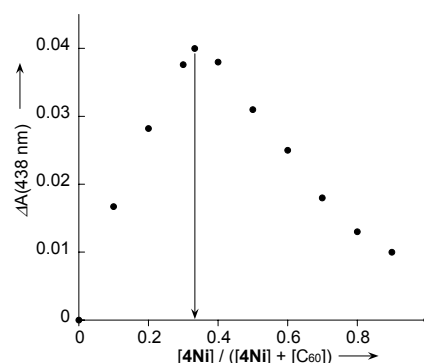

**Figure S13.** Job's plot for  $4\text{Ni}-\text{C}_{60}$  complex formation



### Typical procedure of the $^1\text{H}$ NMR titration

An aliquot of a solution of  $\text{C}_{60}$  was added to a solution of  $4\text{Ni}$ , after evaporation and dissolved in suitable  $\text{CDCl}_3$ , and the resulting solutions were subjected to  $^1\text{H}$  NMR spectroscopy at  $25^\circ\text{C}$  (Figure S14).

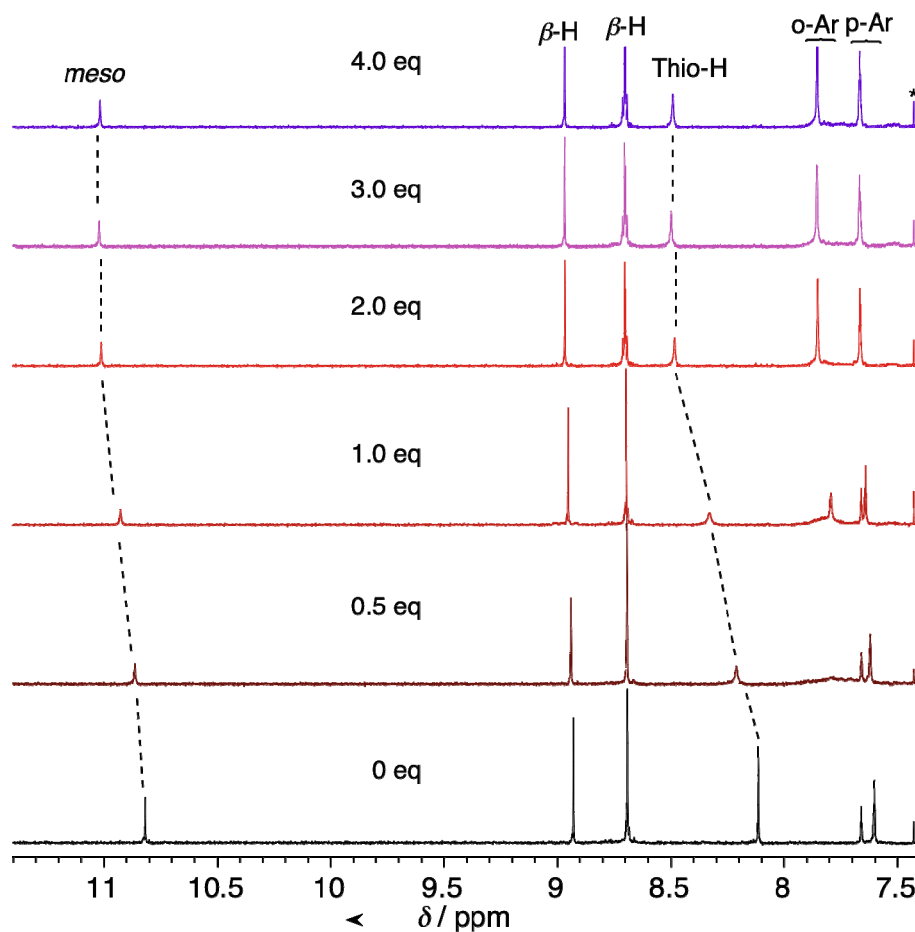

Figure S14  $^1\text{H}$  NMR titration spectra of  $4\text{Ni}$  with  $\text{C}_{60}$  in  $\text{CDCl}_3$  at  $25^\circ\text{C}$ .

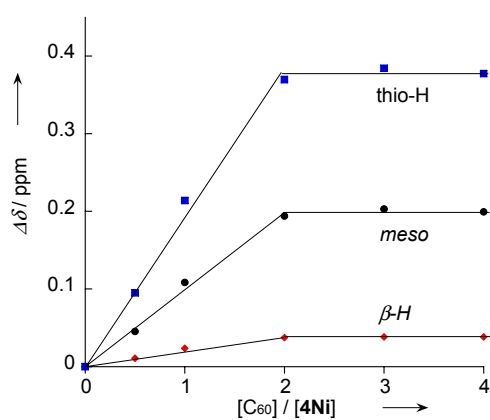

Figure S15. Plots of chemical shift change versus  $[\text{C}_{60}]/[4\text{Ni}]$  in  $\text{CDCl}_3$ ,  $25^\circ\text{C}$ . ( $\Delta\delta = \delta_{\text{obs}} - \delta_0$ , where  $\delta_0$  is  $\delta_{\text{obs}}$  at  $[\text{C}_{60}] = 0 \text{ M}$ )

**Table S1.** Crystal data for **4Zn** and **4Ni-C<sub>60</sub>**.

| Compound                                            | <b>4Zn*</b>                                                                      | <b>4Ni-C<sub>60</sub>*</b>                                                                                                                      |
|-----------------------------------------------------|----------------------------------------------------------------------------------|-------------------------------------------------------------------------------------------------------------------------------------------------|
| Empirical formula                                   | C <sub>264</sub> H <sub>288</sub> N <sub>16</sub> Zn <sub>4</sub> S <sub>4</sub> | C <sub>264</sub> H <sub>282</sub> N <sub>16</sub> Ni <sub>4</sub> S <sub>4</sub> (C <sub>60</sub> ) <sub>3</sub> (dichlorobenzene) <sub>4</sub> |
| Formula weight                                      | 4074.82                                                                          | 6791.90                                                                                                                                         |
| Temperature (K)                                     | 90(2)                                                                            | 90(2)                                                                                                                                           |
| Wavelength (Å)                                      | 0.71069                                                                          | 0.71073                                                                                                                                         |
| Crystal system                                      | Tetragonal                                                                       | Monoclinic                                                                                                                                      |
| Space group                                         | <i>I</i> -42 <i>d</i>                                                            | <i>C</i> 2/ <i>c</i>                                                                                                                            |
| Unit cell dimensions                                | <i>a</i> = 41.392(5) Å<br><br><i>c</i> = 22.518(5) Å                             | <i>a</i> = 25.617(4) Å<br><i>b</i> = 71.860(12) Å <i>β</i> = 92.466(4)°<br><i>c</i> = 26.909(5) Å                                               |
| Volume (Å <sup>3</sup> )                            | 38580(11)                                                                        | 49490(14)                                                                                                                                       |
| Z                                                   | 4                                                                                | 4                                                                                                                                               |
| Density (calc) (Mg/m <sup>3</sup> )                 | 0.702                                                                            | 0.912                                                                                                                                           |
| μ (mm <sup>-1</sup> )                               | 0.302                                                                            | 0.256                                                                                                                                           |
| F(000)                                              | 8672                                                                             | 14120                                                                                                                                           |
| Crystal size (mm <sup>3</sup> )                     | 0.60 × 0.30 × 0.20                                                               | 0.30 × 0.20 × 0.10                                                                                                                              |
| θ for data collection                               | 1.39 to 23.50°                                                                   | 0.84 to 23.50°                                                                                                                                  |
| Index ranges                                        | -46 ≤ <i>h</i> ≤ 42, -46 ≤ <i>k</i> ≤ 45, -25 ≤ <i>l</i> ≤ 23                    | -28 ≤ <i>h</i> ≤ 28, -79 ≤ <i>k</i> ≤ 80, -25 ≤ <i>l</i> ≤ 30                                                                                   |
| Reflections collected                               | 87359                                                                            | 113582                                                                                                                                          |
| Independent reflections                             | 14251 [ <i>R</i> (int) = 0.1355]                                                 | 36533 [ <i>R</i> (int) = 0.1018]                                                                                                                |
| Completeness                                        | 99.7 % (θ = 23.50°)                                                              | 99.7 % (θ = 23.50°)                                                                                                                             |
| Absorption correction                               | Empirical                                                                        | Empirical                                                                                                                                       |
| Max. and min. transmission                          | 0.9421 and 0.8397                                                                | 0.9748 and 0.9271                                                                                                                               |
| Refinement method                                   | Full-matrix least-squares on <i>F</i> <sup>2</sup>                               | Full-matrix least-squares on <i>F</i> <sup>2</sup>                                                                                              |
| Data/restraints/parameters                          | 14251 / 604 / 613                                                                | 36533 / 3447 / 2999                                                                                                                             |
| Goodness-of-fit on <i>F</i> <sup>2</sup>            | 0.715                                                                            | 0.991                                                                                                                                           |
| Final <i>R</i> indices [ <i>I</i> > 2σ( <i>I</i> )] | <i>R</i> <sub>1</sub> = 0.0860, <i>wR</i> <sub>2</sub> = 0.2110                  | <i>R</i> <sub>1</sub> = 0.1191, <i>wR</i> <sub>2</sub> = 0.2915                                                                                 |
| <i>R</i> indices (all data)                         | <i>R</i> <sub>1</sub> = 0.2196, <i>wR</i> <sub>2</sub> = 0.2413                  | <i>R</i> <sub>1</sub> = 0.1780, <i>wR</i> <sub>2</sub> = 0.3194                                                                                 |
| Largest diff. peak and hole                         | 0.252 and -0.238 e.Å <sup>-3</sup>                                               | 0.929 and -0.361 e.Å <sup>-3</sup>                                                                                                              |
| CCDC number                                         | 801517                                                                           | 801516                                                                                                                                          |

\* The contributions to the scattering arising from the presence of the disordered solvents in the crystal were removed by use of the utility SQUEEZE in the PLATON software package.

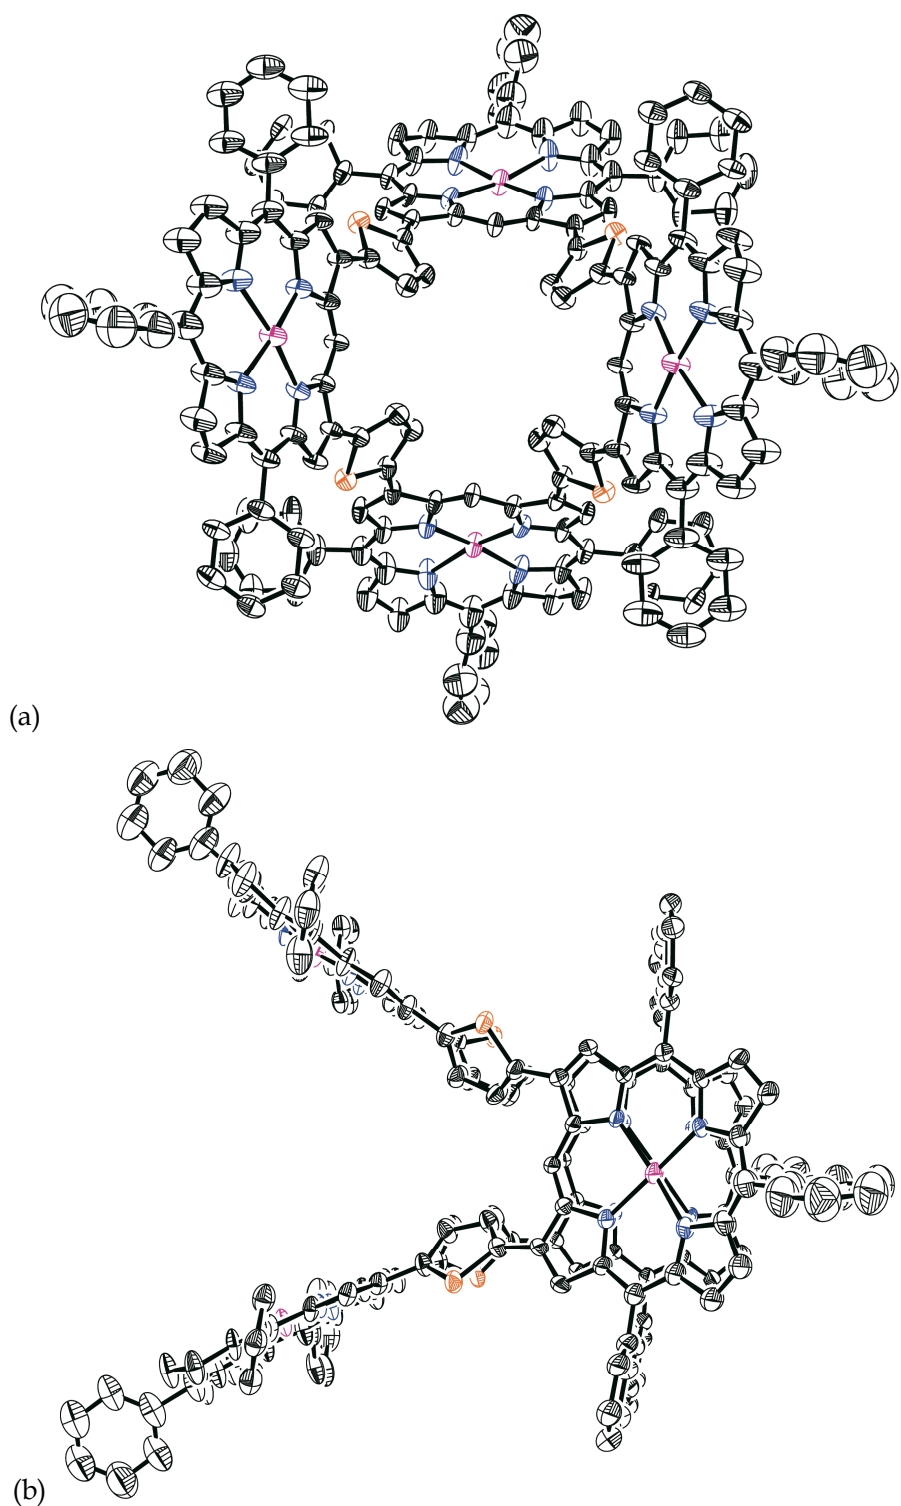

**Figure S16.** X-Ray crystal structure of **4Zn**. (a) Top view, and (b) side view. The thermal ellipsoids are 15% probability level. Hydrogen atoms and <sup>t</sup>Bu groups are omitted for clarity.

Explanation for a "level A" alert: Since the crystals contained many severely disordered solvent molecules, they gave only weak diffractions. However, these are not significant concern for the main skeletal structure.

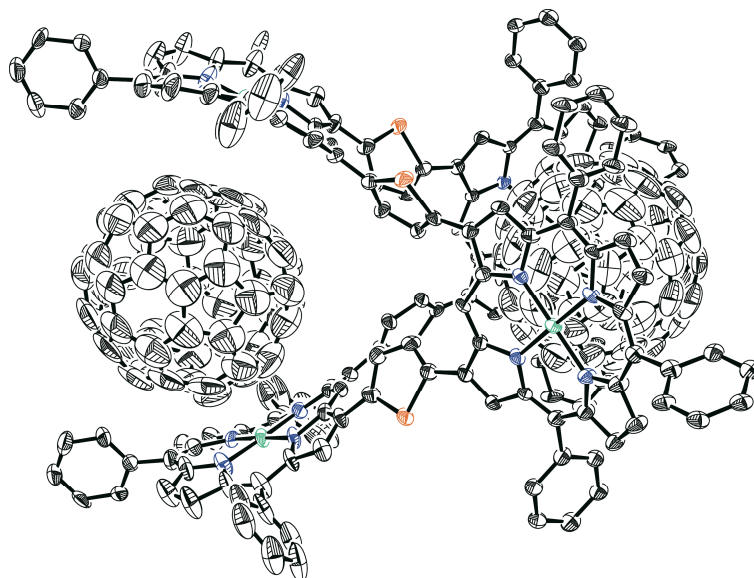

**Figure S17.** X-Ray crystal structure of  $4\text{Ni-C}_{60}$ . The thermal ellipsoids are 30% probability level. Hydrogen atoms, solvent molecules, disordered and outside  $\text{C}_{60}$  molecules, and  $t\text{-Bu}$  groups are omitted for clarity.

Explanation for a "level A" alert: The alert comes from the rotational disorder of *tert*-Butyl groups.

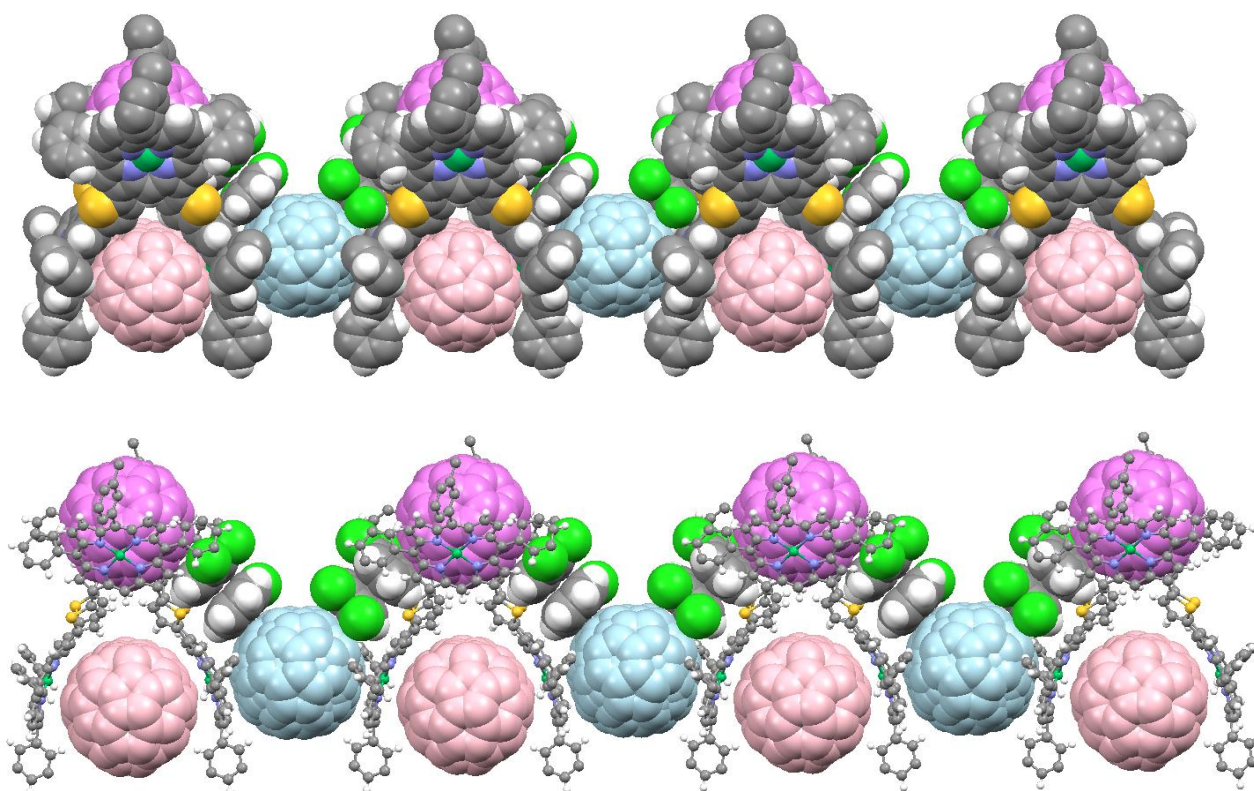

**Figure S18.** A columnar zigzag array of the fullerene molecules along the  $a$ -axis shown as a space-filling model. The blue fullerene molecules interconnect face-to-face with two  $(\text{C}_{60})_2@4\text{Ni}$ . For clarity,  $4\text{Ni}$  units at bottom are shown as a ball-and-stick model.  $t\text{-Bu}$  groups are omitted for clarity.
